# Supplementary material for: Small noncoding differentially methylated copy-number variants, including lncRNA genes, cause a lethal lung developmental disorder
Source: HighWire-hosted journal article supplement (doi:10.1101/gr.141887.112), 2012-10-03
Supplement: Nomenclature_Update.pdf [file Nomenclature_Update.pdf]

The human *FOXF1-AS1* lncRNA gene discussed in this paper has been renamed *FENDRR* by the HUGO Gene Nomenclature Committee (HGNC) to be consistent with the mouse ortholog, *Fendrr*, as described in Grote et al. (2013).

Grote P, Wittler L, Hendrix D, Koch F, Währisch S, Beisaw A, Macura K, Bläss G, Kellis M, Werber M, Herrmann BG. 2013. The Tissue-Specific lncRNA *Fendrr* Is an Essential Regulator of Heart and Body Wall Development in the Mouse. *Dev Cell*. 24: 206-14.
